# Supplementary material
Source: MDPI journal article supplement (https://www.mdpi.com/2076-3417/12/6/3210)
Supplement: s1 [file s1]

## Supplementary Materials

### Binding of Arsenic by common functional groups: an experimental and quantum-mechanical study

D. Chillè<sup>¶,1</sup>, V. Mollica-Nardo<sup>¶,2</sup>, O. Giuffrè<sup>1</sup>, R.C. Ponterio<sup>2</sup>, F. Saija<sup>2</sup>, J. Sponer<sup>3</sup>, S. Trusso, G. Cassone<sup>\*,2</sup>, C. Foti<sup>\*,1</sup>

<sup>1</sup>Dipartimento di Scienze Chimiche, Biologiche, Farmaceutiche ed Ambientali, Università degli Studi di Messina, Salita Sperone 31, 98166 Messina, Italy.

<sup>2</sup>Institute for Chemical-Physical Processes, National Research Council of Italy (IPCF-CNR), V.le F. Stagno d'Alcontres 37, 98158 Messina, Italy

<sup>3</sup>Institute of Biophysics of the Czech Academy of Sciences (IBP-CAS), Královopolská 135, 61265 Brno, Czechia

**Table S1.** As(III) hydrolysis and ligand protonation constants at  $I = 0.15 \text{ mol L}^{-1}$  (NaCl) and  $T = 298.15 \text{ K}$ .

|         | $\log K^a$ | $\log K_1^{H\ b)}$       | $\log \beta_2^{H\ b)}$ | $\log \beta_3^{H\ b)}$ | $\log \beta_4^{H\ b)}$ | $\log \beta_5^{H\ b)}$ | $\log \beta_6^{H\ b)}$ | Ref. <sup>c)</sup> |
|---------|------------|--------------------------|------------------------|------------------------|------------------------|------------------------|------------------------|--------------------|
| As(III) | -9.096     |                          |                        |                        |                        |                        |                        | 1                  |
| mal     |            | 5.22                     | 7.99                   |                        |                        |                        |                        | 2                  |
| tca     |            | 5.819                    | 10.331                 | 13.729                 |                        |                        |                        | 3                  |
| btc     |            | 6.21                     | 11.31                  | 15.39                  | 18.55                  |                        |                        | 4                  |
| mlt     |            | 6.39                     | 11.623                 | 15.743                 | 18.500                 | 20.176                 | 20.898                 | 5                  |
| gly     |            | 9.571                    | 11.933                 |                        |                        |                        |                        | 6                  |
| asp     |            | 9.63                     | 13.09                  | 15.04                  |                        |                        |                        | 6                  |
| lys     |            | 11.06                    | 20.26                  | 22.21                  |                        |                        |                        | 6                  |
| cys     |            | 10.46                    | 18.78                  | 21.04                  |                        |                        |                        | 7                  |
| etan    |            | 10.66±0.03 <sup>c)</sup> |                        |                        |                        |                        |                        | 8                  |
| en      |            | 9.94                     | 17.04                  |                        |                        |                        |                        | 9                  |
| dien    |            | 9.84                     | 18.84                  | 23.04                  |                        |                        |                        | 9                  |
| trien   |            | 9.69                     | 18.79                  | 25.38                  | 28.43                  |                        |                        | 10                 |
| tetren  |            | 9.81                     | 19.05                  | 27.19                  | 31.76                  | 34.45                  |                        | 10                 |
| tla     |            | 10.02                    | 13.52                  |                        |                        |                        |                        | 11                 |
| tma     |            | 10.227                   | 14.997                 | 18.507                 |                        |                        |                        | 11                 |
| dmsa    |            | 11.01                    | 20.32                  | 23.87                  | 26.39                  |                        |                        | 12                 |

<sup>a)</sup> It refers to the reaction:  $\text{As}(\text{OH})_3 + \text{H}_2\text{O} = \text{As}(\text{OH})_4^- + \text{H}^+$ ; <sup>b)</sup>  $\beta_i$  refers to the reaction  $i\text{H} + \text{L} = \text{H}_i\text{L}$  (charges omitted for simplicity); <sup>c)</sup> 1. G. Cassone G., D. Chillè, V. Mollica Nardo, O. Giuffrè, R.C. Ponterio, J. Sponer, S. Trusso, F. Saija, C. Foti, *Dalton Trans.*, 2020, 49, 6302-6311; 2. A. De Robertis, C. De Stefano, C. Foti, *J. Chem. Eng. Data*, 1999, 44, 262-270; 3. C. De Stefano, C. Foti, A. Gianguzza, *Talanta* 1994, 41, (10), 1715-1722.; 4. A. De Robertis, C. Foti, A. Gianguzza, *Ann. Chim. (Rome)* 1993, 83, 485-497; 5. A. De Robertis, C. De Stefano, C. Foti, *Ann. Chim. (Rome)*, 1996, 86, 155-166; 6. C. De Stefano, C. Foti, A. Gianguzza, C. Rigano, S. Sammartano, *Chem. Spec. Bioavail.*, 1995, 7(1), 1-8; 7. V.K. Sharma, F. Casteran, F.J. Millero, C. De Stefano, *J. Solution Chem.*, 2002, 31, 783-792. 8. Unpublished data; 9. A. De Robertis, C. Foti, O. Giuffrè, S. Sammartano, *J. Chem. Eng. Data*, 2001, 46, 1425-1435; 10. A. De Robertis, C. De Stefano, G. Patanè, S. Sammartano, *J. Sol. Chem.*, 1993, 22; 11. C. Bretti, C. De Stefano, C. Foti, O. Giuffrè, S. Sammartano, *J. Solution Chem.*, 2009, 38(10), 1225-1245; 12. Chillè, D.; Cassone, G.; Giacobello, F.; Giuffrè, O.; Mollica Nardo, V.; R.C., P.; Saija, F.; Sponer, J.; Trusso, S.; Foti, C., *Chem. Res. Toxicol.* **2020**, 33, 967-974.
